# Supplementary material
Source: PubMed Central journal article supplement (PMC5557404)
Supplement: NIHMS824160-supplement-Supplemental_Material.pdf [file NIHMS824160-supplement-Supplemental_Material.pdf]

SUPPLEMENTAL MATERIAL

SUPPLEMENTAL FIGURES

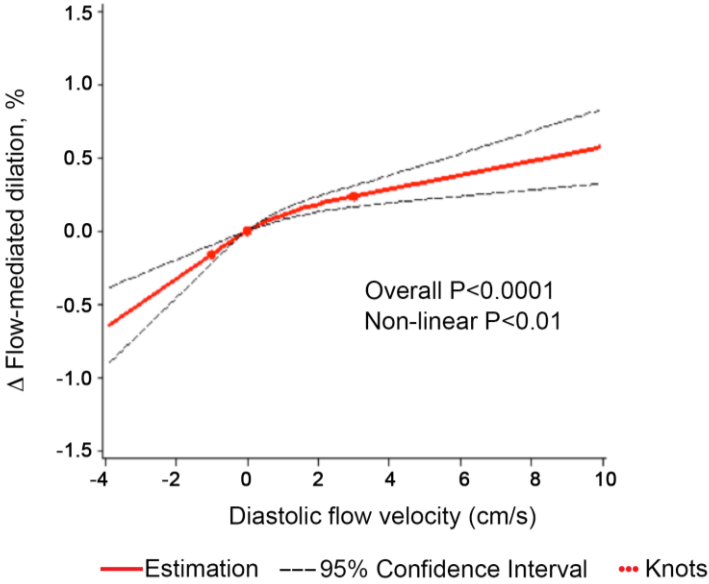

Figure S1.

## **SUPPLEMENTAL FIGURES LEGENDS**

**Figure S1.** Multivariable-adjusted association of diastolic flow velocity and flow-mediated dilation when adjusting for hyperemic flow velocity, using restricted cubic splines with 3 knots at diastolic flow velocity at the 20th, 50th, and 80th percentile. Analyses were based on the entire cohort; for visual display the range of mean diastolic flow shown on the x-axis was limited to the 5th to 95th percentile. The y-axis represents the difference in flow-mediated dilation. The solid line shows the association of mean diastolic flow velocity and flow-mediated dilation. The dashed lines represent the 95% confidence interval.
